# Supplementary material
Source: HighWire-hosted journal article supplement (https://diabetes.diabetesjournals.org/content/suppl/2002/01/07/51.2.536)
Supplement: db123-ta.pdf [file db123-ta.pdf]

**Tables as an attachment**

Table A1. Odds ratios for each polymorphism adjusted for age and gender, and for age, gender, and BMI

| Polymorphism | Genotype | Odds ratio (95% CI) adjusted for |                    |
|--------------|----------|----------------------------------|--------------------|
|              |          | Age, gender                      | Age, gender, BMI   |
| -11414       | A/G      | 1.0                              | 1.0                |
|              | A/A      | 1.06 (0.80 - 1.41)               | 1.03 (0.77 - 1.36) |
|              | G/G      | 1.62 (0.84 - 3.18)               | 1.59 (0.82 - 3.14) |
| -11379       | G/A      | 1.0                              | 1.0                |
|              | G/G      | 1.23 (0.67 - 2.37)               | 1.22 (0.65 - 2.34) |
| -11365       | G/G      | 1.0                              | 1.0                |
|              | C/G      | 1.11 (0.63 - 1.96)               | 1.06 (0.60 - 1.89) |
|              | C/C      | 1.23 (0.93 - 1.65)               | 1.27 (0.95 - 1.67) |
| -4034        | A/A      | 1.0                              | 1.0                |
|              | A/C+C/C  | 1.37 (0.92 - 2.04)               | 1.42 (0.95 - 2.13) |
| -3964        | A/A      | 1.0                              | 1.0                |
|              | A/G+G/G  | 1.28 (0.84 - 1.94)               | 1.32 (0.86 - 2.01) |
| 45           | T/T      | 1.0                              | 1.0                |
|              | T/G      | 1.41 (1.06 - 1.88)               | 1.40 (1.01 - 1.81) |
|              | G/G      | 1.70 (1.09 - 2.65)               | 1.67 (1.06 - 2.62) |
| 276          | T/T      | 1.0                              | 1.0                |
|              | G/T      | 1.59 (0.89 - 2.95)               | 1.54 (0.85 - 2.85) |
|              | G/G      | 2.16 (1.22 - 3.95)               | 2.08 (1.17 - 3.82) |
| 346          | A/A      | 1.0                              | 1.0                |
|              | G/G      | 1.03 (0.63 - 1.58)               | 1.01 (0.64 - 1.60) |
|              | A/G      | 1.23 (0.90 - 1.59)               | 1.17 (0.87 - 1.56) |
| 712          | G/G      | 1.0                              | 1.0                |
|              | A/A      | 1.08 (0.71 - 1.65)               | 1.10 (0.72 - 1.69) |
|              | A/G      | 1.15 (0.85 - 1.55)               | 1.14 (0.84 - 1.54) |
| 2019         | D/D      | 1.0                              | 1.0                |
|              | D/I      | 1.06 (0.79 - 1.42)               | 1.06 (0.78 - 1.42) |
|              | I/I      | 1.13 (0.76 - 1.68)               | 1.13 (0.75 - 1.69) |

Table A2. Estimated frequencies of SNP45-SNP276 haplotypes in type 2 diabetic and non-diabetic subjects.

| Haplotype  | T2DM  | NDM   | Odds ratio** |
|------------|-------|-------|--------------|
| 276T – 45T | 0.219 | 0.286 | 1            |
| 276T – 45G | 0.013 | 0.011 | * 1.53       |
| 276G – 45T | 0.428 | 0.428 | 1.31         |
| 276G – 45G | 0.340 | 0.275 | 1.61         |

The frequencies of haplotypes were estimated by using the EM algorithm. Differences in frequencies were evaluated by the  $\chi^2$  test. T2DM (type 2 diabetes), NDM (non-diabetic subjects). Odds ratios relative to the 276T-45T haplotype are shown.

\*  $P = 0.029$

Table A3. Pair-wise linkage disequilibrium among SNPs in the adiponectin gene in the combined sample of type 2 and non-diabetic subjects.

| Normalized linkage disequilibrium coefficient ( $ D' $ ) |        |        |        |       |       |      |      |      |      |
|----------------------------------------------------------|--------|--------|--------|-------|-------|------|------|------|------|
| Polymorphism                                             | -11414 | -11379 | -11365 | -4034 | -3964 | 45   | 276  | 349  | 712  |
| -11379                                                   | 0.96   |        |        |       |       |      |      |      |      |
| -11365                                                   | 0.46   | 0.12   |        |       |       |      |      |      |      |
| -4034                                                    | 0.15   | 0.28   | 0.60   |       |       |      |      |      |      |
| -3964                                                    | 0.31   | 0.83   | 0.64   | 0.92  |       |      |      |      |      |
| 45                                                       | 0.01   | 0.00   | 0.37   | 0.40  | 0.95  |      |      |      |      |
| 276                                                      | 0.16   | 0.58   | 0.04   | 0.55  | 0.45  | 0.95 |      |      |      |
| 349                                                      | 0.04   | 0.02   | 0.32   | 0.10  | 0.00  | 0.45 | 0.47 |      |      |
| 712                                                      | 0.23   | 0.05   | 0.00   | 0.10  | 0.13  | 0.00 | 0.07 | 0.03 |      |
| 2019                                                     | 0.00   | 0.02   | 0.17   | 0.04  | 0.03  | 0.56 | 0.43 | 0.47 | 0.01 |
